# Supplementary material
Source: PubMed Central journal article supplement (PMC2996042)
Supplement: NIHMS248620-supplement-1.pdf [file NIHMS248620-supplement-1.pdf]

## Supporting Information

Polarization Effects for Hydrogen-Bonded Complexes of Substituted Phenols with Water and Chloride Ion

William L. Jorgensen,\* Kasper P. Jensen, and Anastassia N. Alexandrova

Department of Chemistry, Yale University, 225 Prospect Street, New Haven, Connecticut 06520-8107

|                      | <b>HF/6-311+G**</b> | <b>MP2/6-311+G**</b>  | <b>complex 3</b> | <b>complex 3</b> | <b>complex 4</b> | <b>complex 4</b> |
|----------------------|---------------------|-----------------------|------------------|------------------|------------------|------------------|
|                      |                     | <b>//HF/6-311+G**</b> | <b>HF</b>        | <b>MP2</b>       | <b>HF</b>        | <b>MP2</b>       |
| PhOH                 | -305.6398948        | -306.6632927          | -381.7031394     | -382.950224      | -381.698935      | -382.945302      |
| O <sub>2</sub> NPhOH | -509.1698046        | -510.7640653          | -585.2357555     | -587.05353       | -585.227898      | -587.045841      |
| H <sub>2</sub> NPhOH | -360.6846571        | -361.8919039          | -436.7473622     | -438.178292      | -436.744321      | -438.174517      |
| NPhOH                | -397.3958459        | -398.6979011          | -473.4613274     | -474.987067      | -473.454109      | -474.979742      |
| H <sub>3</sub> CPhOH | -344.6849562        | -345.8627592          | -420.7479083     | -422.149451      | -420.744218      | -422.144996      |
| ClPhOH               | -764.5627466        | -765.7223036          | -840.626995      | -842.010201      | -840.621461      | -842.004454      |
| F <sub>3</sub> CPhOH | -641.3572507        | -643.1211196          | -717.4220994     | -719.409746      | -717.415686      | -719.403233      |
| FPhOH                | -404.5183477        | -405.7388421          | -480.5822528     | -482.026468      | -480.577304      | -482.02109       |
| HOPhOH               | -380.5193946        | -381.7417692          | -456.5825477     | -458.028654      | -456.578883      | -458.024465      |
| H <sub>2</sub> O     | -76.0533051         | -76.2739687           |                  |                  |                  |                  |
| Cl <sup>-</sup>      | -459.5654245        | -459.7035702          |                  |                  |                  |                  |

Energies in a.u.

| <b>complex 5</b> | <b>complex 5</b> |
|------------------|------------------|
| <b>HF</b>        | <b>MP2</b>       |
| -765.2345464     | -766.4066246     |
| -968.7801555     | -970.5233004     |
| -820.2771823     | -821.6329068     |
| -857.003979      | -858.4553969     |
| -804.2784247     | -805.6051856     |
| -1224.163494     | -1225.471472     |
| -1100.961312     | -1102.875345     |
| -864.117137      | -865.4864205     |
| -840.1136808     | -841.484703      |
